# Supplementary figures and images for: Organic Matter and Pigments in the Wall Paintings of Me-Taw-Ya Temple in Bagan Valley, Myanmar
Source: MDPI journal article supplement (doi:10.3390/app112311441), 2021-12-02

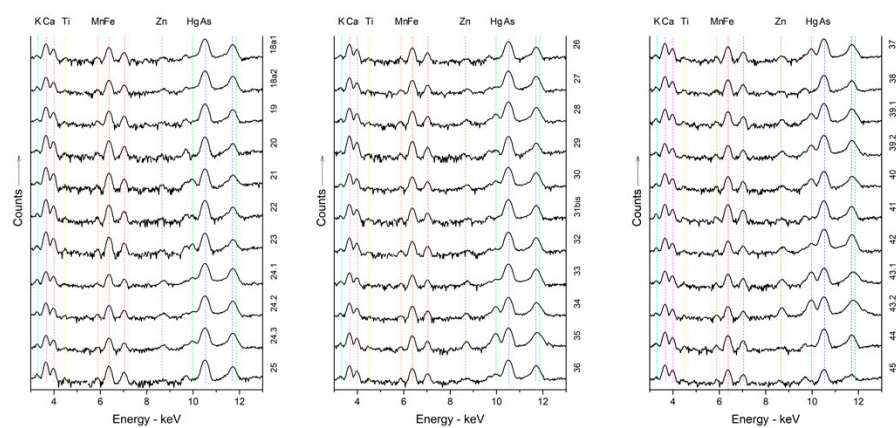

**Figure S1.** X-ray characteristic peaks of the main elements in the MY samples.

Supplement: s1 [file s1]
